# Supplementary material for: Effect of anions on the self-assembly of Zn(ii) with a hydrogenated Schiff base ligand: structural diversity and photoluminescent properties
Source: Royal Society of Chemistry journal article supplement (doi:10.1039/c3ce26937j), 2013-01-01

## ***SUPPORTING INFORMATION***

### Effect of anions on the self-assembly of Zn(II) with a hydrogenated Schiff base ligand: structural diversity and photoluminescent properties

Yuehong Wen,<sup>a</sup> Tianlu Sheng,<sup>a</sup> Shengmin Hu,<sup>a</sup> Yanlong Wang,<sup>a</sup> Chunhong Tan,<sup>a</sup> Xiao Ma,<sup>a</sup>

Zhenzhen Xue,<sup>a</sup> Yong Wang,<sup>a</sup> and Xintao Wu\*<sup>a</sup>

*State Key Laboratory of Structure Chemistry Fujian Institute of Research on the Structure of*

*Matter, Chinese Academy of Sciences, Fuzhou, 350002, China.*

*E-mail: wxt@fjirsm.ac.cn; Fax: +86-591-83719238; Tel: +86-591-83719238*

**Table S1** Selected bond lengths (Å) and angles (°) of complex **1**.

|                         |            |                                |            |
|-------------------------|------------|--------------------------------|------------|
| Zn(2)–N(1)              | 2.081(4)   | N(1)–Zn(2)–N(2)                | 86.29(14)  |
| Zn(2)–N(2)              | 2.086(3)   | N(1)–Zn(2)–Cl(3)               | 110.71(11) |
| Zn(2)–Cl(3)             | 2.2024(14) | N(2)–Zn(2)–Cl(3)               | 117.92(11) |
| Zn(2)–Cl(4)             | 2.2123(14) | N(1)–Zn(2)–Cl(4)               | 114.41(11) |
| Zn(1)–N(3)              | 2.026(4)   | N(2)–Zn(2)–Cl(4)               | 106.62(11) |
| Zn(1)–N(4) <sup>a</sup> | 2.056(4)   | Cl(3)–Zn(2)–Cl(4)              | 117.08(6)  |
| Zn(1)–Cl(2)             | 2.2115(14) | N(3)–Zn(1)–N(4) <sup>a</sup>   | 102.06(16) |
| Zn(1)–Cl(1)             | 2.2265(14) | N(3)–Zn(1)–Cl(2)               | 112.61(11) |
| C(9)–N(1)               | 1.483(6)   | N(4) <sup>a</sup> –Zn(1)–Cl(2) | 106.64(12) |
| C(7)–N(3)               | 1.346(6)   | N(3)–Zn(1)–Cl(1)               | 106.23(11) |
| N(4)–Zn(1) <sup>a</sup> | 2.056(4)   | N(4) <sup>a</sup> –Zn(1)–Cl(1) | 107.57(13) |
|                         |            | Cl(2)–Zn(1)–Cl(1)              | 120.15(6)  |

Symmetry codes: (a)  $-x+1, -y+2, -z$ .

**Table S2** Selected bond lengths (Å) and angles (°) of complex **2**.

|                         |            |                                |            |
|-------------------------|------------|--------------------------------|------------|
| Zn(1)–N(3)              | 2.089(5)   | N(3)–Zn(1)–Br(3)               | 110.76(15) |
| Zn(1)–N(2)              | 2.095(5)   | N(2)–Zn(1)–Br(3)               | 117.17(15) |
| Zn(1)–Br(3)             | 2.3399(11) | N(3)–Zn(1)–Br(4)               | 114.23(15) |
| Zn(1)–Br(4)             | 2.3482(12) | N(2)–Zn(1)–Br(4)               | 106.82(15) |
| Zn(2)–N(1)              | 2.047(5)   | Br(3)–Zn(1)–Br(4)              | 117.56(5)  |
| Zn(2)–N(4) <sup>a</sup> | 2.061(5)   | N(1)–Zn(2)–N(4) <sup>a</sup>   | 102.5(2)   |
| Zn(2)–Br(2)             | 2.3545(12) | N(1)–Zn(2)–Br(2)               | 111.64(15) |
| Zn(2)–Br(1)             | 2.3655(12) | N(4) <sup>a</sup> –Zn(2)–Br(2) | 107.34(17) |
| N(4)–Zn(2) <sup>a</sup> | 2.061(5)   | N(1)–Zn(2)–Br(1)               | 106.98(15) |
| N(3)–Zn(1)–N(2)         | 86.3(2)    | N(4) <sup>a</sup> –Zn(2)–Br(1) | 107.26(17) |
|                         |            | Br(2)–Zn(2)–Br(1)              | 119.69(5)  |

Symmetry codes: (a)  $-x+1, -y+1, -z$ .

**Table S3** Selected bond lengths (Å) and angles (°) of complex **3**.

|                                            |           |                                            |            |
|--------------------------------------------|-----------|--------------------------------------------|------------|
| Zn(1)-N(3)                                 | 2.118(5)  | N(3) <sup>a</sup> -Zn(1)-N(2) <sup>c</sup> | 89.35(17)  |
| Zn(1)-N(3) <sup>a</sup>                    | 2.118(5)  | N(2) <sup>b</sup> -Zn(1)-N(2) <sup>c</sup> | 88.47(17)  |
| Zn(1)-N(2) <sup>b</sup>                    | 2.215(4)  | N(3)-Zn(1)-N(1) <sup>a</sup>               | 86.32(19)  |
| Zn(1)-N(2) <sup>c</sup>                    | 2.215(4)  | N(3) <sup>a</sup> -Zn(1)-N(1) <sup>a</sup> | 93.36(19)  |
| Zn(1)-N(1) <sup>a</sup>                    | 2.255(4)  | N(2) <sup>b</sup> -Zn(1)-N(1) <sup>a</sup> | 94.88(14)  |
| Zn(1)-N(1)                                 | 2.255(4)  | N(2) <sup>c</sup> -Zn(1)-N(1) <sup>a</sup> | 175.66(14) |
| N(2)-Zn(1) <sup>c</sup>                    | 2.215(4)  | N(3)-Zn(1)-N(1)                            | 93.36(19)  |
| N(3)-Zn(1)-N(3) <sup>a</sup>               | 179.6(3)  | N(3) <sup>a</sup> -Zn(1)-N(1)              | 86.32(19)  |
| N(3)-Zn(1)-N(2) <sup>b</sup>               | 89.35(17) | N(2) <sup>b</sup> -Zn(1)-N(1)              | 175.66(14) |
| N(3) <sup>a</sup> -Zn(1)-N(2) <sup>b</sup> | 90.96(16) | N(2) <sup>c</sup> -Zn(1)-N(1)              | 94.88(14)  |
| N(3)-Zn(1)-N(2) <sup>c</sup>               | 90.96(16) | N(1) <sup>a</sup> -Zn(1)-N(1)              | 81.9(2)    |

Symmetry codes: (a)  $-x+5/4, y, -z+5/4$ ; (b)  $x+1/4, -y, z+1/4$ ; (c)  $-x+1, -y, -z+1$ .

**Table S4** Selected bond lengths (Å) and angles (°) of complex **4**.

|                                             |            |                                             |            |
|---------------------------------------------|------------|---------------------------------------------|------------|
| Zn(1)-N(4)                                  | 2.181(3)   | N(2)-Zn(1)-Cl(2) <sup>a</sup>               | 83.75(7)   |
| Zn(1)-N(4) <sup>a</sup>                     | 2.181(3)   | N(4)-Zn(1)-Cl(2)                            | 88.35(8)   |
| Zn(1)-N(2) <sup>a</sup>                     | 2.286(3)   | N(4) <sup>a</sup> -Zn(1)-Cl(2)              | 94.69(8)   |
| Zn(1)-N(2)                                  | 2.286(3)   | N(2) <sup>a</sup> -Zn(1)-Cl(2)              | 83.75(7)   |
| Zn(1)-Cl(2) <sub>a</sub>                    | 2.5339(10) | N(2)-Zn(1)-Cl(2)                            | 92.98(7)   |
| Zn(1)-Cl(2)                                 | 2.5339(10) | Cl(2) <sup>a</sup> -Zn(1)-Cl(2)             | 175.76(5)  |
| Zn(2)-N(1) <sup>b</sup>                     | 2.166(3)   | N(1) <sup>b</sup> -Zn(2)-N(1)               | 84.71(15)  |
| Zn(2)-N(1)                                  | 2.166(3)   | N(1) <sup>b</sup> -Zn(2)-N(3)               | 178.05(11) |
| Zn(2)-N(3)                                  | 2.233(3)   | N(1)-Zn(2)-N(3)                             | 96.63(10)  |
| Zn(2)-N(3) <sup>b</sup>                     | 2.233(3)   | N(1) <sup>b</sup> -Zn(2)-N(3) <sup>b</sup>  | 96.63(10)  |
| Zn(2)-Cl(1) <sup>b</sup>                    | 2.5568(10) | N(1)-Zn(2)-N(3) <sup>b</sup>                | 178.05(11) |
| Zn(2)-Cl(1)                                 | 2.5568(10) | N(3)-Zn(2)-N(3) <sup>b</sup>                | 82.06(15)  |
| N(4)-Zn(1)-N(4) <sup>a</sup>                | 88.51(14)  | N(1) <sup>b</sup> -Zn(2)-Cl(1) <sup>b</sup> | 95.16(8)   |
| N(4)-Zn(1)-N(2) <sup>a</sup>                | 170.93(11) | N(1)-Zn(2)-Cl(1) <sup>b</sup>               | 91.29(8)   |
| N(4) <sup>a</sup> -Zn(1)-N(2) <sup>a</sup>  | 96.55(10)  | N(3)-Zn(2)-Cl(1) <sup>b</sup>               | 86.23(7)   |
| N(4)-Zn(1)-N(2)                             | 96.55(10)  | N(3) <sup>b</sup> -Zn(2)-Cl(1) <sup>b</sup> | 87.19(7)   |
| N(4) <sup>a</sup> -Zn(1)-N(2)               | 170.93(11) | N(1) <sup>b</sup> -Zn(2)-Cl(1)              | 91.29(8)   |
| N(2) <sup>a</sup> -Zn(1)-N(2)               | 79.46(15)  | N(1)-Zn(2)-Cl(1)                            | 95.16(8)   |
| N(4)-Zn(1)-Cl(2) <sup>a</sup>               | 94.69(8)   | N(3)-Zn(2)-Cl(1)                            | 87.19(7)   |
| N(4) <sup>a</sup> -Zn(1)-Cl(2) <sup>a</sup> | 88.35(8)   | N(3) <sup>b</sup> -Zn(2)-Cl(1)              | 86.23(7)   |
| N(2) <sup>a</sup> -Zn(1)-Cl(2) <sup>a</sup> | 92.98(7)   | Cl(1) <sup>b</sup> -Zn(2)-Cl(1)             | 171.28(5)  |

Symmetry codes: (a)  $-x+1, -y, z$ ; (b)  $-x, -y, z$ .

**Table S5** Selected bond lengths (Å) and angles (°) of complex **5**.

|                               |            |                                            |            |
|-------------------------------|------------|--------------------------------------------|------------|
| Zn(1)-N(3) <sup>a</sup>       | 2.135(4)   | N(3) <sup>a</sup> -Zn(1)-N(4) <sup>b</sup> | 89.38(12)  |
| Zn(1)-N(4) <sup>b</sup>       | 2.161(4)   | N(4) <sup>b</sup> -Zn(1)-O(1)              | 90.21(16)  |
| Zn(1)-N(1)                    | 2.167(4)   | N(1)-Zn(1)-O(1)                            | 88.49(14)  |
| Zn(1)-N(2)                    | 2.203(4)   | N(2)-Zn(1)-O(1)                            | 90.88(16)  |
| Zn(1)-O(1)                    | 2.210(4)   | N(3) <sup>a</sup> -Zn(1)-O(2)              | 91.54(13)  |
| Zn(1)-O(2)                    | 2.217(4)   | N(4) <sup>b</sup> -Zn(1)-O(2)              | 88.34(16)  |
| N(3)-Zn(1) <sup>c</sup>       | 2.135(4)   | N(1)-Zn(1)-O(2)                            | 91.67(14)  |
| N(4)-Zn(1) <sup>d</sup>       | 2.161(4)   | N(2)-Zn(1)-O(2)                            | 90.56(16)  |
| Cl(1)-O(14)                   | 1.412(7)   | O(1)-Zn(1)-O(2)                            | 178.55(13) |
| Cl(1)-O(13)                   | 1.428(7)   | O(14)-Cl(1)-O(13)                          | 110.7(6)   |
| Cl(1)-O(11)                   | 1.451(7)   | O(14)-Cl(1)-O(11)                          | 111.9(7)   |
| Cl(1)-O(12)                   | 1.456(7)   | O(13)-Cl(1)-O(11)                          | 108.9(7)   |
| Cl(2)-O(21)                   | 1.378(8)   | O(14)-Cl(1)-O(12)                          | 110.5(7)   |
| Cl(2)-O(22)                   | 1.437(8)   | O(13)-Cl(1)-O(12)                          | 108.5(6)   |
| Cl(2)-O(23)                   | 1.437(8)   | O(11)-Cl(1)-O(12)                          | 106.2(6)   |
| Cl(2)-O(24)                   | 1.480(9)   | O(21)-Cl(2)-O(22)                          | 112.4(7)   |
| N(3) <sup>a</sup> -Zn(1)-N(1) | 175.45(14) | O(21)-Cl(2)-O(23)                          | 113.1(8)   |
| N(4) <sup>b</sup> -Zn(1)-N(1) | 93.94(12)  | O(22)-Cl(2)-O(23)                          | 109.5(8)   |
| N(3) <sup>a</sup> -Zn(1)-N(2) | 94.80(13)  | O(21)-Cl(2)-O(24)                          | 108.7(8)   |
| N(4) <sup>b</sup> -Zn(1)-N(2) | 175.70(14) | O(22)-Cl(2)-O(24)                          | 106.4(8)   |
| N(1)-Zn(1)-N(2)               | 81.93(13)  | O(23)-Cl(2)-O(24)                          | 106.2(7)   |
| N(3) <sup>a</sup> -Zn(1)-O(1) | 88.39(13)  |                                            |            |

Symmetry codes: (a)  $-x+2, y+1/2, -z+1/2$ ; (b)  $x+1, y, z$ ; (c)  $-x+2, y-1/2, -z+1/2$ ; (d)  $x-1, y, z$ .

**Table S6** Selected bond lengths (Å) and angles (°) of complex **6**.

|                                            |           |                               |           |
|--------------------------------------------|-----------|-------------------------------|-----------|
| Zn(1)-O(1)                                 | 2.072(2)  | N(3) <sup>a</sup> -Zn(1)-N(2) | 171.71(9) |
| Zn(1)-N(3) <sup>a</sup>                    | 2.160(2)  | N(4) <sup>b</sup> -Zn(1)-N(2) | 97.89(9)  |
| Zn(1)-N(4) <sup>b</sup>                    | 2.180(3)  | O(1)-Zn(1)-O(3)               | 177.86(8) |
| Zn(1)-N(2)                                 | 2.183(2)  | N(3) <sup>a</sup> -Zn(1)-O(3) | 88.30(9)  |
| Zn(1)-O(3)                                 | 2.202(2)  | N(4) <sup>b</sup> -Zn(1)-O(3) | 86.95(9)  |
| Zn(1)-N(1)                                 | 2.258(3)  | N(2)-Zn(1)-O(3)               | 88.92(9)  |
| N(3)-Zn(1) <sup>c</sup>                    | 2.160(2)  | O(1)-Zn(1)-N(1)               | 89.03(10) |
| N(4)-Zn(1) <sup>d</sup>                    | 2.180(3)  | N(3) <sup>a</sup> -Zn(1)-N(1) | 91.63(10) |
| O(1)-Zn(1)-N(3) <sup>a</sup>               | 89.67(10) | N(4) <sup>b</sup> -Zn(1)-N(1) | 176.91(9) |
| O(1)-Zn(1)-N(4) <sup>b</sup>               | 93.74(10) | N(2)-Zn(1)-N(1)               | 80.58(9)  |
| N(3) <sup>a</sup> -Zn(1)-N(4) <sup>b</sup> | 89.76(10) | O(3)-Zn(1)-N(1)               | 90.33(9)  |
| O(1)-Zn(1)-N(2)                            | 92.99(10) | C(15)-O(1)-Zn(1)              | 133.2(2)  |

Symmetry codes: (a)  $x+1, y, z$ ; (b)  $x, y-1, z$ ; (c)  $x-1, y, z$ ; (d)  $x, y+1, z$ .

**Figure S1** Comparison of experimental and calculated powder X-ray diffraction patterns of complex **1**.

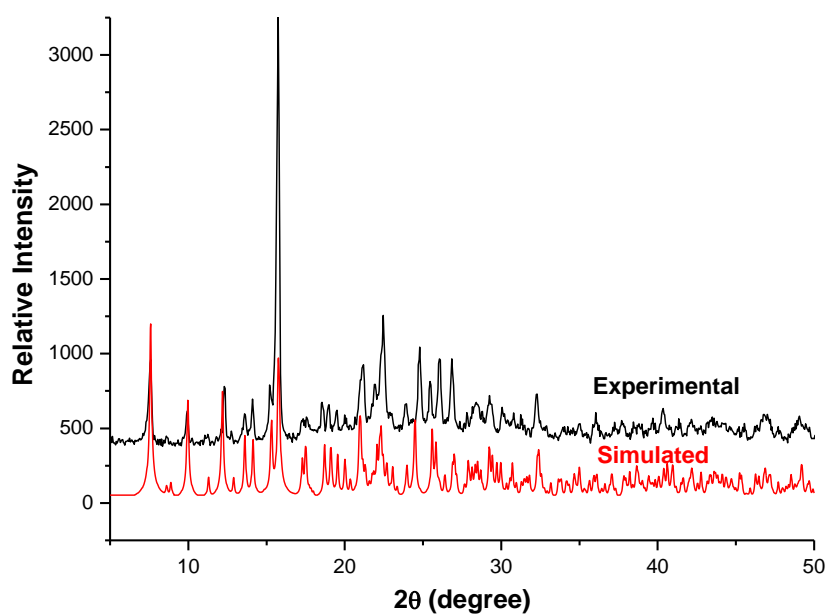

**Figure S2** Comparison of experimental and calculated powder X-ray diffraction patterns of complex **2**.

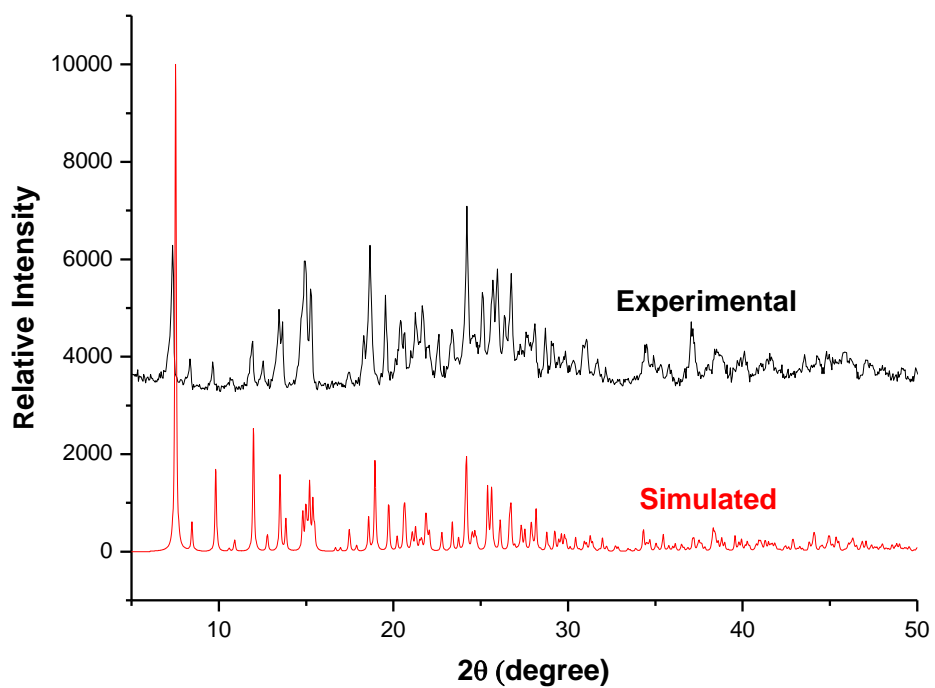

**Figure S3** Comparison of experimental and calculated powder X-ray diffraction patterns of complex **3**.

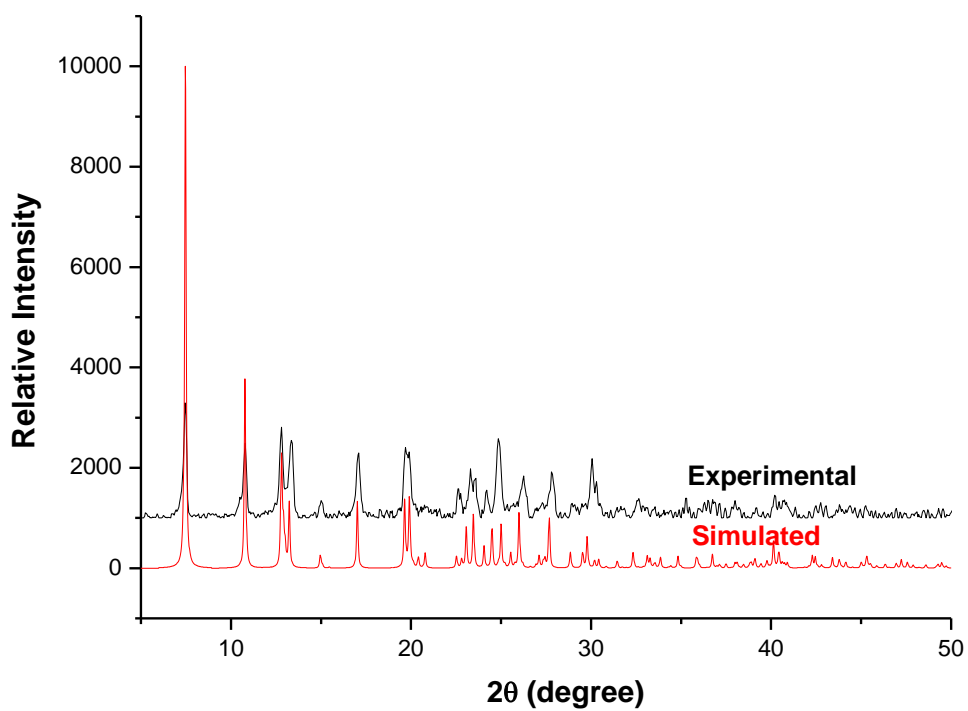

**Figure S4** Comparison of experimental and calculated powder X-ray diffraction patterns of complex **4**.

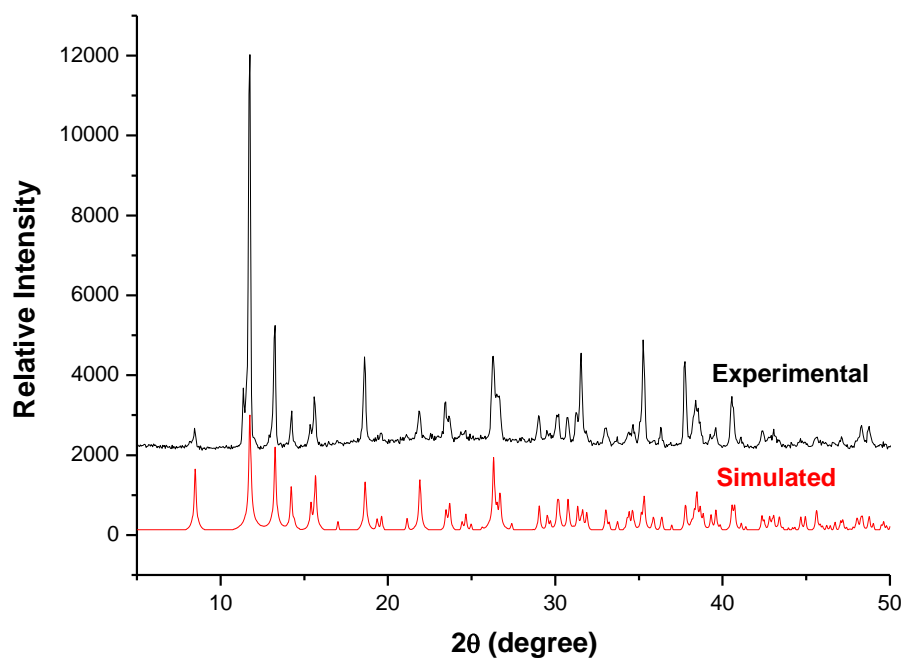

**Figure S5** Comparison of experimental and calculated powder X-ray diffraction patterns of complex **5**.

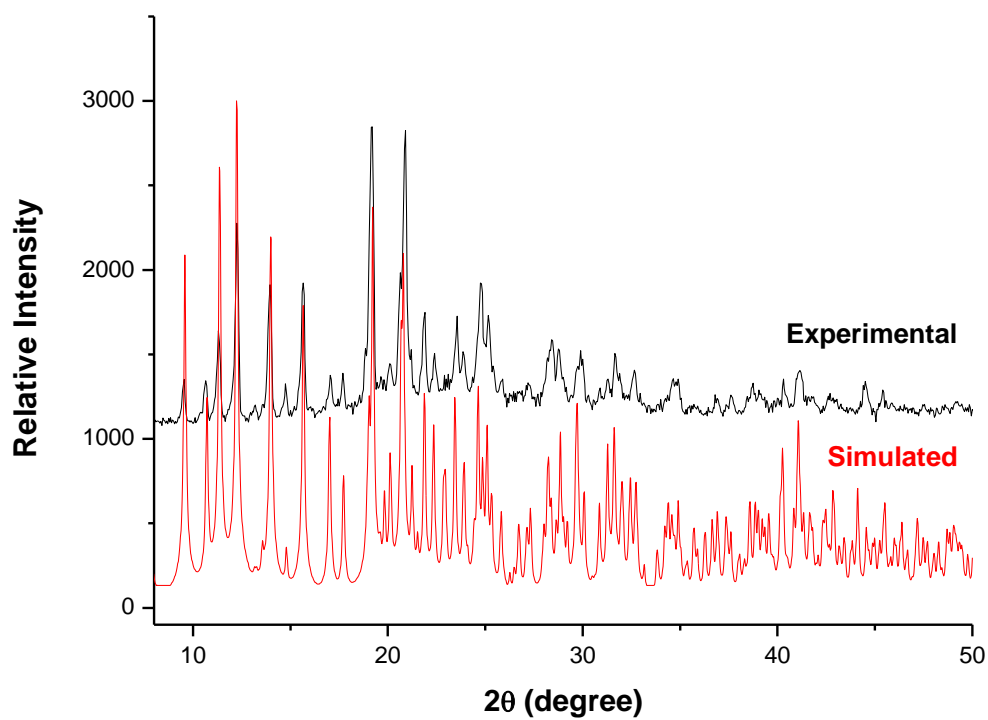

**Figure S6** Comparison of experimental and calculated powder X-ray diffraction patterns of complex **6**.

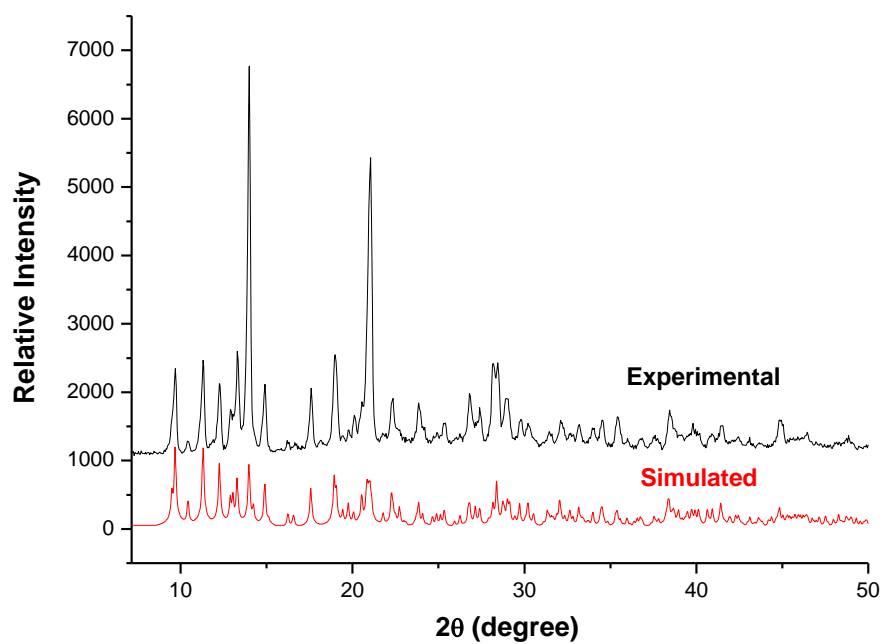

Supplement: c3ce26937j.pdf [file c3ce26937j.pdf]
